# Supplementary material for: Controlled Release of Collagen-Binding SDF-1α Improves Cardiac Function after Myocardial Infarction by Recruiting Endogenous Stem Cells
Source: PubMed Central journal article supplement (PMC4881239; doi:10.1038/srep26683), 2016-05-26
Supplement: srep26683-s1.pdf [file srep26683-s1.pdf]

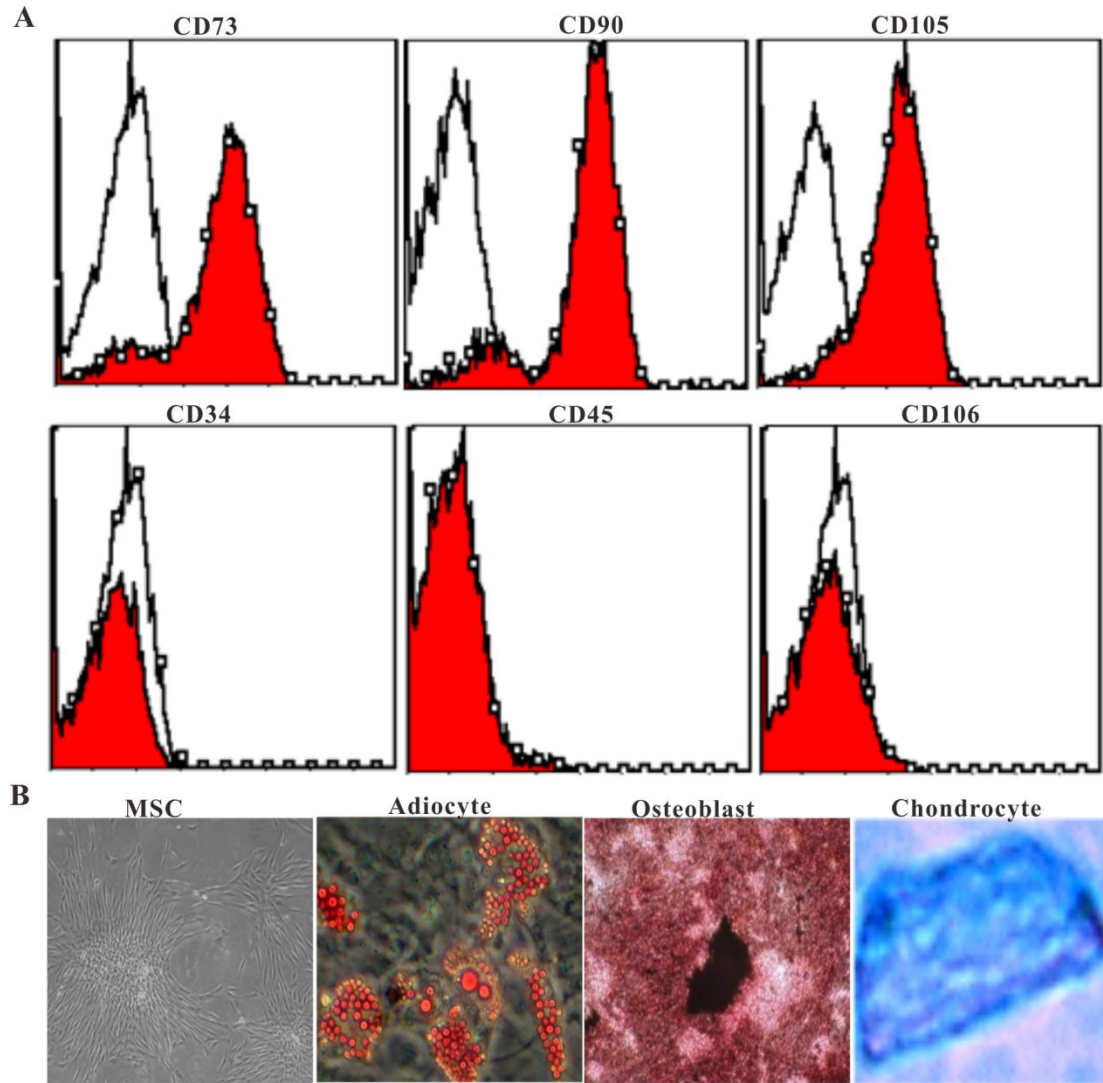

**Figure S1: Identification of hMSC.** (A) The results of flow cytometry showed that MSCs are positive for CD73, CD90 and CD105, while negative for CD34, CD44 and CD106. (B) MSCs have uniform fibroblast-like morphology and can differentiate into adipocytes, osteoblasts and chondrocytes.
